# Supplementary material
Source: PubMed Central journal article supplement (PMC10425992)
Supplement: pt3c00046_si_001.pdf [file pt3c00046_si_001.pdf]

*Supplementary information for*

**Preclinical Characterization of 22-(4'-Pyridinecarbonyl) Jorunnamycin A Against Lung  
Cancer Cell Invasion and Angiogenesis via AKT/mTOR Signaling**

Iksen Iksen, Suthasinee Seephan, Vudhiporn Limprasutr, Suwimon Sinsook, Koonchira Buaban,  
Supakarn Chamni, Varisa Pongrakhananon\*

**AUTHOR INFORMATION**

**Corresponding Author**

**Varisa Pongrakhananon** – *Department of Pharmacology and Physiology, Faculty of Pharmaceutical Sciences, Chulalongkorn University, Bangkok, 10330, Thailand; Preclinical Toxicity and Efficacy Assessment of Medicines and Chemicals Research Unit, Chulalongkorn University, Bangkok, 10330 Thailand; Email: Varisa.p@pharm.chula.ac.th*

**Authors**

**Iksen Iksen** – *Department of Pharmacology and Physiology, Faculty of Pharmaceutical Sciences, Chulalongkorn University, Bangkok, 10330, Thailand*

**Suthasinee Seephan** – *Pharmaceutical Sciences and Technology Program, Faculty of Pharmaceutical Sciences, Chulalongkorn University, Bangkok 10330, Thailand*

**Vudhiporn Limprasutr** – *Department of Pharmacology and Physiology, Faculty of Pharmaceutical Sciences, Chulalongkorn University, Bangkok, 10330, Thailand; Preclinical Toxicity and Efficacy Assessment of Medicines and Chemicals Research Unit, Chulalongkorn University, Bangkok, 10330 Thailand*

**Suwimon Sinsook** – *Pharmaceutical Sciences and Technology Program, Faculty of Pharmaceutical Sciences, Chulalongkorn University, Bangkok 10330, Thailand;*

*Department of Pharmacognosy and Pharmaceutical Botany, Faculty of Pharmaceutical Sciences, Chulalongkorn University, Bangkok 10330, Thailand*

**Koonchira Buaban** – *Department of Pharmacognosy and Pharmaceutical Botany, Faculty of Pharmaceutical Sciences, Chulalongkorn University, Bangkok, 10330, Thailand; Natural Products and Nanoparticles Research Unit (NP2), Chulalongkorn University, Bangkok 10330, Thailand*

**Supakarn Chamni** – *Department of Pharmacognosy and Pharmaceutical Botany, Faculty of Pharmaceutical Sciences, Chulalongkorn University, Bangkok, 10330, Thailand; Natural Products and Nanoparticles Research Unit (NP2), Chulalongkorn University, Bangkok 10330, Thailand*

Number of pages: 10

Number of figures: 4

Number of tables: 3

## Supplementary Methods

**Pharmacokinetic Parameters Prediction.** The online web server known as "pkCSM-tools" (<http://biosig.unimelb.edu.au/pkcsm/>) was utilized for predictions of pharmacokinetic features such as absorption, distribution, metabolism, excretion, and toxicity.

## Supplementary Figures and Tables

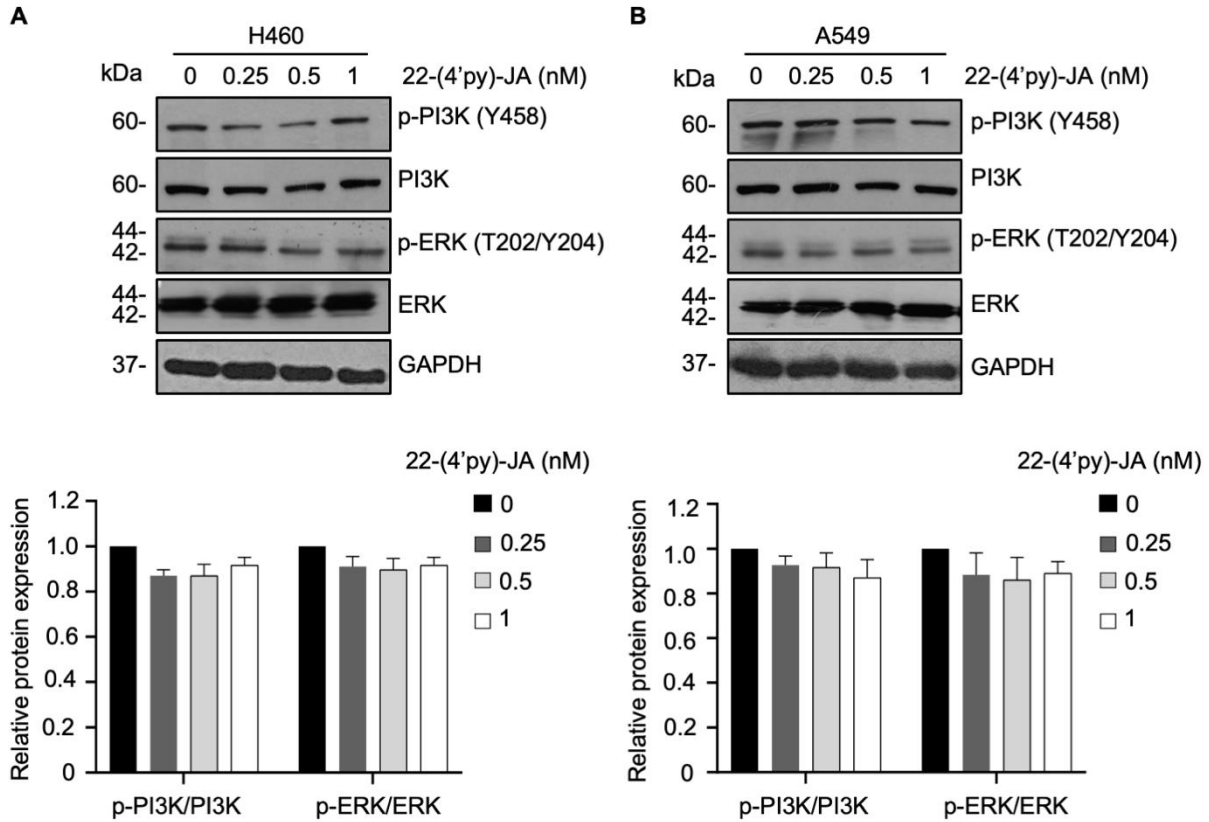

**Figure S1.** The effect of 22-(4'py)-JA on PI3K and ERK signaling. (A) H460 and (B) A549 cells were treated with non-toxic concentration of 22-(4'py)-JA for 24 h. The protein expression of p-PI3K, PI3K, p-ERK1/2, and ERK1/2 were investigated by western blot analysis and quantified relatively to those of GAPDH. Plots are mean  $\pm$  SEM. \* $p < 0.05$  vs. control group (n=3).

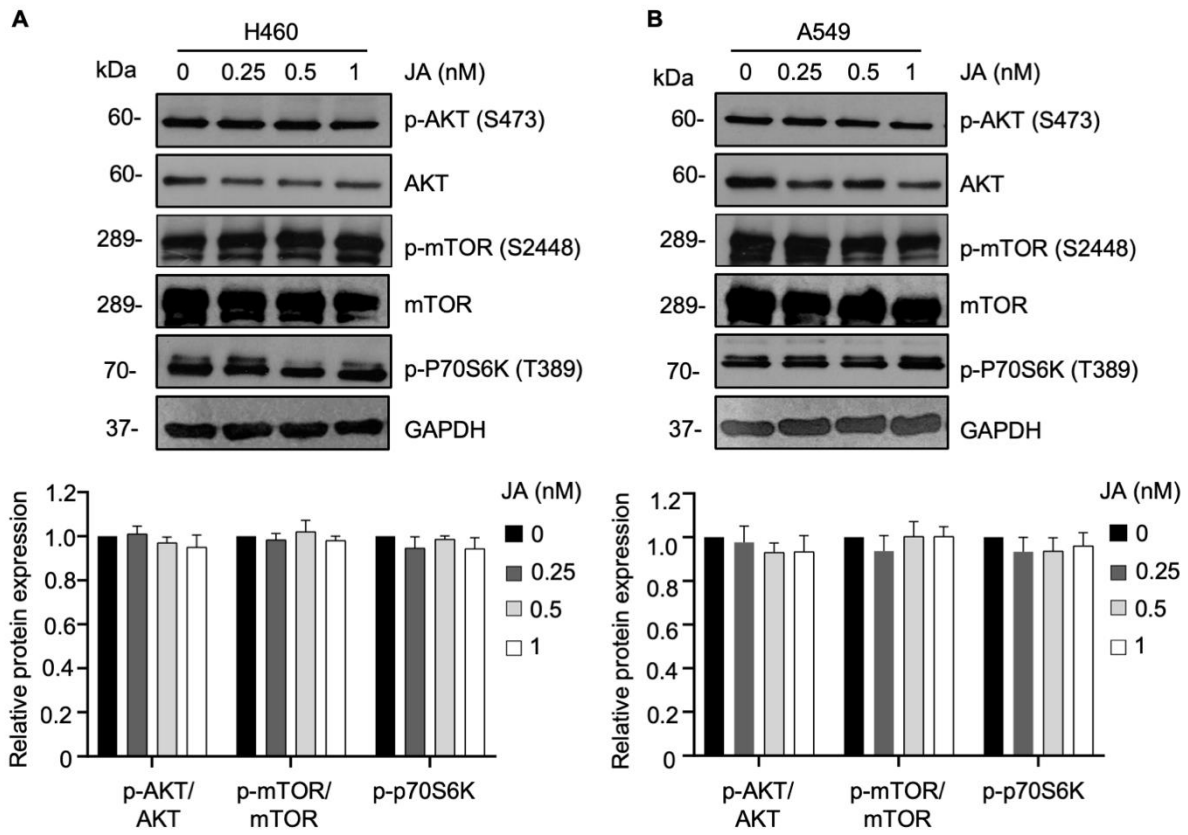

**Figure S2.** The effect of JA on AKT/mTOR/p70S6K signaling. (A) H460 and (B) A549 cells were treated with JA (0-1 nM) for 24h. The protein expression of p-AKT, AKT, p-mTOR, mTOR, and p-p70S6K were investigated by western blot analysis and quantified relatively to those of GAPDH. Plots are mean  $\pm$  SEM. \* $p < 0.05$  vs. control group (n=3).

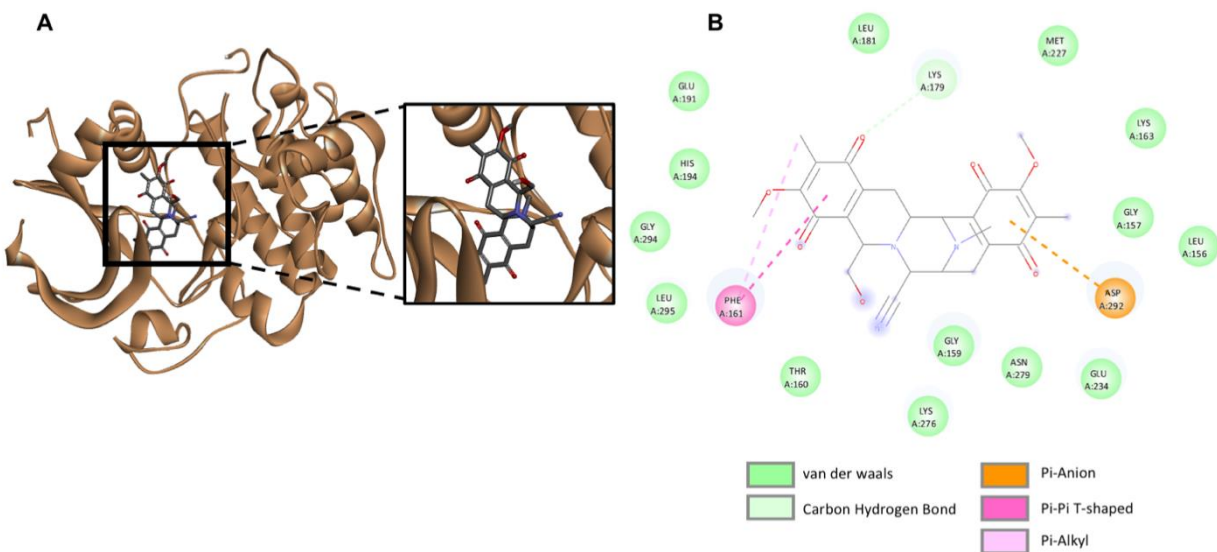

**Figure S3.** Molecular docking and dynamic interaction of JA and AKT1. Interactions between JA and AKT1 (PDB ID: 3MVH) are shown in (A) 3D and (B) 2D images. Molecular docking was performed using PyRx Autodock Vina, and schematization of the interaction between JA and AKT1 was obtained using the BIOVIA Discovery Studio Visualizer.

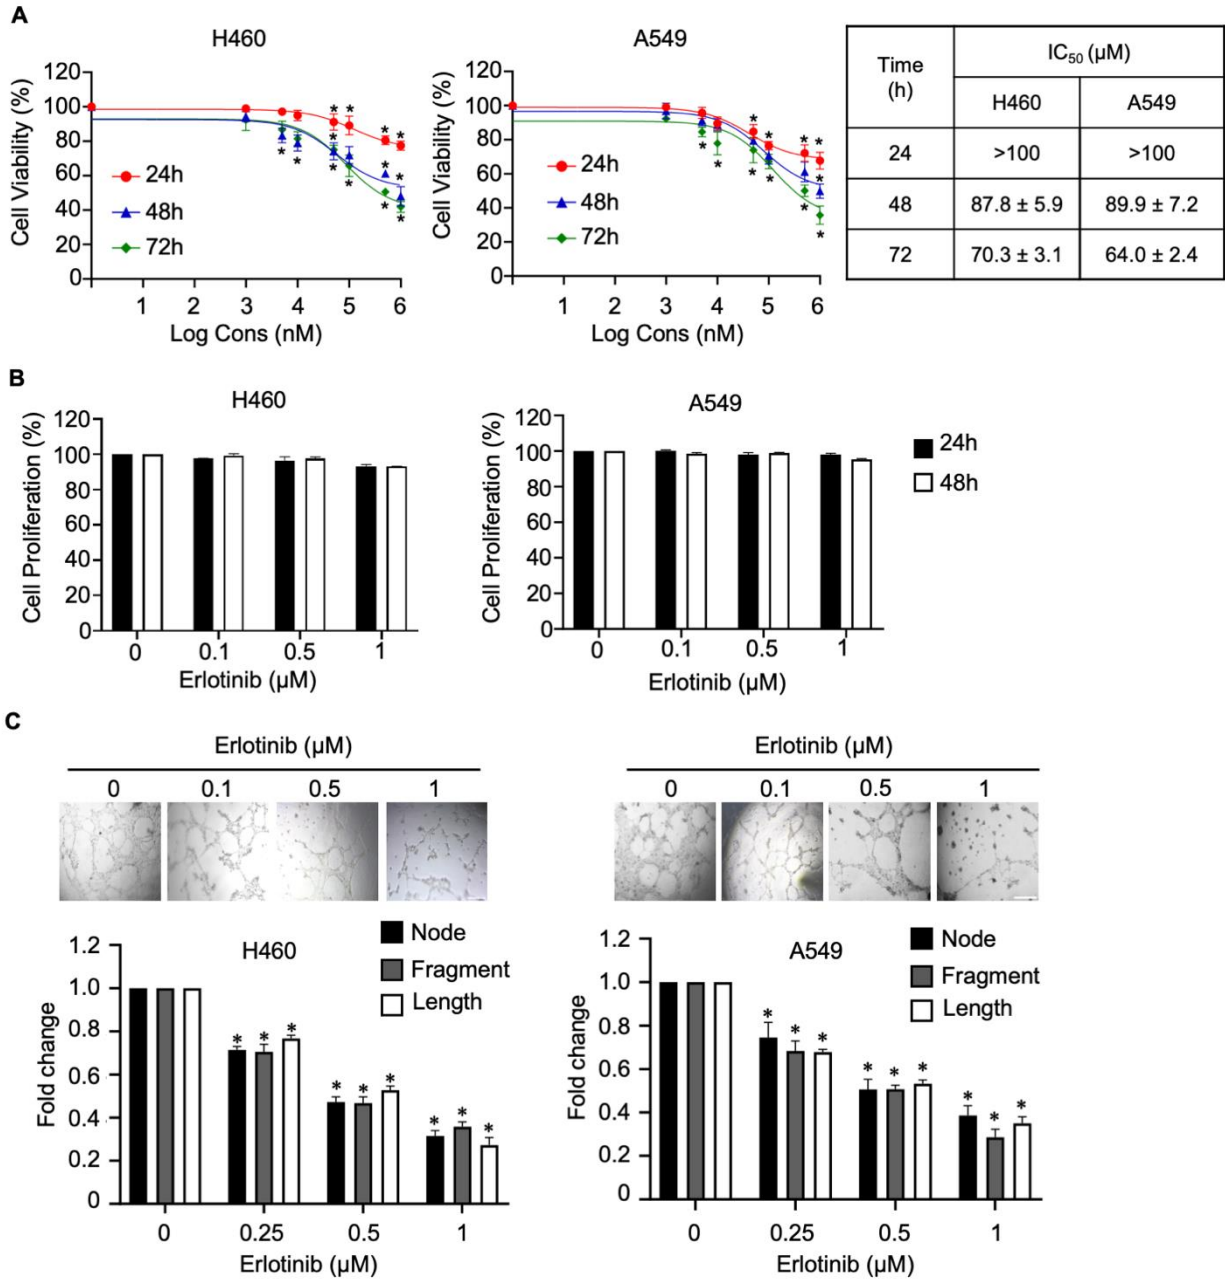

**Figure S4.** The anti-cancer activities of erlotinib on NSCLC cells. (A) H460 and A549 were treated with Erlotinib (0-100 μM) for 24, 48, and 72 h. Cell viability was analyzed by the MTT assay and represented as a percentage of cell viability. (B) H460 and A549 cells were treated with non-toxic concentrations of Erlotinib (0-1 μM) for 24 and 48 h. Cell proliferation was evaluated by the MTT assay. (C) HUVECs were cultured in the medium obtained from H460 and A549 cells

treated with or without Erlotinib. After 24 h, tube formation was imaged, and its parameters were quantified using ImageJ software. Plots present the fold change of node number, fragment number, and fragment length. Scale bar, 100  $\mu\text{m}$ . The data are presented as the mean  $\pm$  SEM (n = 3). \*p < 0.05 vs untreated control cells. All data were analyzed by using Analysis of variance (ANOVA) followed by the Tukey post-hoc test.

**Table S1. The interactions between AKT1 (PDB:3MVH) and 22-(4'py)-JA or JA.**

| <b>Compound</b>     | <b>Binding interaction</b> | <b>Amino acids</b>                                                                                                     |
|---------------------|----------------------------|------------------------------------------------------------------------------------------------------------------------|
| <b>22-(4'py)-JA</b> | Hydrogen                   | LEU156, GLY162, LYS179, GLU234                                                                                         |
|                     | Hydrophobic                | LEU156, ALA177, MET281                                                                                                 |
|                     | Van der Walls              | GLY157, LYS158, GLY159, PHE161, LYS163, ILE165, LEU181, LYS276, GLU278, ASN279, ASP292, GLY294, LEU295, THR312, PHE438 |
|                     | Electrostatic              | ASP274                                                                                                                 |
| <b>JA</b>           | Hydrogen                   | LYS179                                                                                                                 |
|                     | Hydrophobic                | PHE161                                                                                                                 |
|                     | Van der Walls              | LEU156, GLY157, GLY159, THR160, LYS163, LEU181, GLU191, HIS194, MET227, GLU234, LYS276, ASN279, LEU295                 |
|                     | Electrostatic              | ASP292                                                                                                                 |



**Table S2. Pharmacokinetic parameters of 22-(4'py)-JA and JA obtained from pkCSM-tools**

| <b>Parameter</b> | <b>Model</b>                   | <b>Unit</b>      | <b>22-(4'py)-JA</b> | <b>JA</b> | <b>Accepted Value</b> |
|------------------|--------------------------------|------------------|---------------------|-----------|-----------------------|
| Absorption       | Water solubility               | Log mol/L        | -3.558              | -3.562    | -                     |
|                  | Intestinal absorption          | % absorbed       | 71.223              | 60.436    | >30%                  |
|                  | Skin permeability              | Log Kp           | -2.741              | -2.767    | >-2.5                 |
| Distribution     | BBB permeability               | Log BB           | -1.397              | -1.053    | <0.3                  |
|                  | CNS permeability               | Log PS           | -3.203              | -3.542    | >-2                   |
| Metabolism       | CYP2D6 substrate               | Yes/No           | No                  | No        | -                     |
|                  | CYP3A4 substrate               | Yes/No           | Yes                 | Yes       | -                     |
| Excretion        | Total clearance                | Log mL/min/kg    | 0.675               | 0.789     | -                     |
|                  | Renal OCT2 substrate           | Yes/No           | No                  | No        | No                    |
| Toxicity         | AMES toxicity                  | Yes/No           | No                  | No        | No                    |
|                  | Maximum tolerated dose (human) | Log mg/kg/day    | -0.922              | -0.322    | <0.477                |
|                  | hERG I inhibitor               | Yes/No           | No                  | No        | No                    |
|                  | hERG II inhibitor              | Yes/No           | No                  | No        | No                    |
|                  | Hepatotoxicity                 | Yes/No           | Yes                 | Yes       | No                    |
|                  | Skin sensitization             | Yes/No           | No                  | No        | No                    |
|                  | Oral rat chronic toxicity      | Log mg/kg bw/day | 1.094               | 2.25      | -                     |

**Table S3. List of primers used for qRT-PCR.**

| <b>Genes</b>                           | <b>Primer sequences</b>      | <b>T<sub>m</sub> (°C)</b> |
|----------------------------------------|------------------------------|---------------------------|
| <b><i>GAPDH</i></b>                    | F: ACATCGCTCAGACACCATG       | 61.00                     |
|                                        | R: TGTAGTTGAGGTCAATGAAGGG    | 61.00                     |
| <b><i>MMP-2</i></b>                    | F: GAAGTATGGGAACGCCGATGG     | 61.14                     |
|                                        | R: TTGTCGCGGTCGTAGTCCTCA     | 63.49                     |
| <b><i>MMP-9</i></b>                    | F: CCTGGAGACCTGAGAACCAATC    | 61.18                     |
|                                        | R: CCACCCGAGTGTAACCATAGC     | 58.00                     |
| <b><i>VEGF</i></b>                     | F: TGCTTCTGAGTTGCCAGGA       | 61.42                     |
|                                        | R: TGGTTTCAATGGTGTGAGGACATAG | 61.04                     |
| <b><i>HIF1-<math>\alpha</math></i></b> | F: TTTGCTGAAGACACAGAAGCAAAGA | 61.61                     |
|                                        | R: GGAAGTCATCATCCATTGGGATA   | 59.34                     |
